1 **Title** : Efficacy and Safety of Immunosuppressive Treatment in IgA Nephropathy: A  
2 Meta-analysis of Randomized Controlled Trials

3

4 **Authors** : Zheng Zhang<sup>1,2</sup>, Yue Yang<sup>2</sup>, Shi-min Jiang<sup>1,2</sup>, Wen-ge Li<sup>2\*</sup>

5 **Author contributions statement:**

6 Zheng Zhang designed this study and conducted literature retrieval, data extraction, data  
7 analysis and article writing.

8 Yue Yang participated in literature retrieval, data extraction and data analysis.

9 Shi-min Jiang participated in data extraction.

10 Wen-ge Li guided the research.

11

12 **Institution:**

13 1. Graduate School of Peking Union Medical College, Beijing, China;

14 2. Department of Nephrology, China- Japan Friendship Hospital, Beijing, China.

15

16 **\*Corresponding author's contact information:**

17 Wen-ge Li

18 E- Mail: [wenge\\_lee2002@126.com](mailto:wenge_lee2002@126.com)

19

20 **Competing interests statement:** There is no conflict of interest in this article.

21

22

23

24 **Abstract**

25 **Background:** There is some controversy regarding the efficacy and safety of  
26 immunosuppressive agents for the treatment of kidney diseases. The recent STOP-IgAN and  
27 TESTING studies have focused attention on the application of immunosuppressive agents in  
28 IgA nephropathy (IgAN). This study investigated the benefits and risks of  
29 immunosuppressive agents in IgAN.

30 **Methods:** MEDLINE, EMBASE, the Cochrane Library, and article reference lists were  
31 searched for randomized controlled trials (RCTs) comparing immunosuppressive agents with  
32 any other non-immunosuppressive agents for treating IgAN. A meta-analysis was performed  
33 on the outcomes of proteinuria, creatinine (Cr), estimated glomerular filtration rate (eGFR),  
34 and adverse events in patients with IgAN, and trial sequential analyses were also performed  
35 for outcomes.

36 **Results:** Twenty-nine RCTs (1957 patients) that met our inclusion criteria were identified.  
37 Steroids (weighted mean difference [WMD]  $-0.70$ , 95% confidence interval [CI]  $-1.2$  to  
38  $-0.20$ ), non-steroidal immunosuppressive agents (NSI) (WMD  $-0.43$ , 95% CI  $-0.55$  to  
39  $-0.31$ ), and combined steroidal and non-steroidal immunosuppressive agents (S&NSI)  
40 (WMD  $-1.46$ , 95% CI  $-2.13$  to  $-0.79$ ) therapy significantly reduced proteinuria levels in  
41 patients with IgAN. Steroid treatment significantly reduced the risk for end-stage renal  
42 disease (ESRD) (relative risk [RR]  $0.39$ , CI  $0.19$  to  $0.79$ ). The immunosuppressive therapy  
43 group showed significant increases in gastrointestinal, hematological, dermatological, and  
44 genitourinary side effects, as well as impaired glucose tolerance or diabetes. Hyperkalemia  
45 was more common in the control group.

46 **Conclusion:** Immunosuppressive therapy can significantly reduce proteinuria and ESRD risk

47 in patients with IgAN, but with a concomitant increase in adverse reactions. Therefore, care  
48 is required in the application of immunosuppressive agents in IgAN.

49

## 50 **Introduction**

51 IgA nephropathy (IgAN) is one of the most common primary glomerular diseases (1). A  
52 systematic review demonstrated an overall population incidence of IgAN of 2.5/100000/year  
53 (2). There is still no uniform standard of treatment for IgAN. The 2012 Kidney Disease:  
54 Improving Global Outcomes (KDIGO) guidelines (3) for IgAN recommend treatment with a  
55 renin-angiotensin system (RAS) blocker, such as angiotensin-converting enzyme inhibitors  
56 (ACEIs) and angiotensin II receptor blockers (ARBs), in patients with proteinuria with  
57 protein excretion  $> 1$  g/day. Corticosteroid therapy can be considered in patients with  
58 proteinuria  $> 1$  g/day after 3–6 months of best supportive treatment and without renal failure.  
59 Intensive immunosuppression is reserved for patients with crescents in more than half the  
60 glomeruli and a rapid decline in renal function.

61 The publication of the Supportive versus Immunosuppressive Therapy of Progressive IgA  
62 Nephropathy (STOP-IgAN) trial in 2015 and Therapeutic Evaluation of Steroids in IgA  
63 Nephropathy Global (TESTING) trial in 2017 focused attention on the treatment of IgAN  
64 with immunosuppressive agents. According to the results of these two large randomized  
65 controlled trials (RCTs), there is still no clear evidence that immunosuppressive therapy can  
66 improve the prognosis of IgAN. Therefore, we retrieved RCTs on immunosuppressive  
67 therapy for IgAN, and performed a meta-analysis of the efficacy and safety of  
68 immunosuppressive therapy in this disease.

69 Immunosuppressive agents were divided into three subgroups for this meta-analysis: steroids,

70 non-steroidal immunosuppressive (NSI) agents, and steroids combined with non-steroidal  
71 immunosuppressive (S&NSI) agents. Their efficacy and safety were compared relative to  
72 controls for the treatment of IgAN.

73 This meta-analysis was performed in accordance with the recommendations of the Cochrane  
74 handbook for systematic reviews of interventions (4) and is reported in compliance with the  
75 Preferred Reporting Items for Systematic Reviews and Meta-Analyses (PRISMA) statement  
76 guidelines (5). The protocol and registration information are available at  
77 <http://www.crd.york.ac.uk/PROSPERO/> (CRD42018096197).

78

#### 79 **Inclusion and exclusion criteria**

80 This investigation required studies to meet the following inclusion criteria: the study was an  
81 RCT; the study compared different immunosuppressive agents versus  
82 non-immunosuppressive agents/placebo/no treatment; and study subjects were adult or  
83 pediatric patients with biopsy-proven IgAN.

84 Studies were rejected according to the following exclusion criteria: immunosuppressant not  
85 given orally or intravenously; study subjects with secondary IgAN; no data available for this  
86 study in the article, data included in other articles, or data repeated in other articles; and  
87 article not in English.

88

#### 89 **Data sources and searches**

90 The MEDLINE, EMBASE, and Cochrane Library medical databases were searched to  
91 retrieve relevant studies. Searches were performed in English, and each search retrieved  
92 studies that were published between establishment of the database and May 2018.

93 A comprehensive search strategy was established to ensure the comprehensive and accurate  
94 retrieval of studies. Specifically, the MEDLINE and Cochrane Library databases were  
95 searched using the method described in the Cochrane Policy Manual for optimizing the  
96 sensitivity and precision of the search process (6), whereas EMBASE was searched using a  
97 sensitivity–specificity filter optimized by the McMaster/Hedges team (7). The following  
98 search terms were used: IgAN, steroids, glucocorticoids, immunosuppressive agents,  
99 angiotensin-converting enzyme inhibitors, angiotensin receptor antagonists, and placebo.  
100 After completing the electronic query of the aforementioned databases, we also searched  
101 relevant professional journals manually.

102

### 103 **Data extraction and quality assessment**

104 Two investigators (ZZ and YY) independently selected studies from the retrieved literature  
105 based on the inclusion criteria and extracted the data and analytical results of these studies. If  
106 the two investigators had different opinions regarding the quality of a study, a third  
107 investigator (SMJ) examined the disputed study and discussed it with the two aforementioned  
108 reviewers. Data were included for consideration only if discussions allowed the three authors  
109 to achieve consensus regarding the data.

110 If necessary, daily proteinuria was recalculated as g/day. Values for eGFR were based on the  
111 data provided by the authors of the included studies.

112 We evaluated treatment-related changes based on changes between the pre-treatment and  
113 post-treatment mean values and standard deviations (SDs) of the examined outcome  
114 measures. As the standard error of the mean (SEM) was used in some studies, we calculated  
115 the SD using the formula:  $SEM \times \text{square root of sample size}$ . In addition, 95% confidence

116 intervals (CIs) were used in some studies; we calculated the SD using the formula: ((upper  
117 limit of 95% CI – lower limit of 95% CI)/(2 × 1.96)) ×  $\sqrt{n}$ . Publication bias is defined as a  
118 condition in which studies with positive results are more likely to be published. Assessment  
119 of the risk of bias was performed following the Cochrane handbook.

120

### 121 **Risk of bias assessment**

122 Two authors (ZZ and YY) independently assessed risk of bias using the Cochrane  
123 risk-of-bias tool (8). They reviewed each trial and gave a score of high, low, or unclear risk of  
124 bias according to the following criteria: random sequence generation, allocation concealment,  
125 blinding of participants and personnel to the study protocol, blinding of outcome assessment,  
126 incomplete outcome data, selective reporting, and other bias.

127

### 128 **Statistical analyses**

129 To compare the effects of immunosuppressive agents and control treatment on proteinuria  
130 excretion and serum levels of creatinine, data on eGFR and end-stage renal disease (ESRD)  
131 were extracted for meta-analyses. Subgroup analyses were performed for each outcome based  
132 on the type of immunosuppressive agent.

133 For continuous outcomes, the differences in means and the 95% CI in mean change between  
134 baseline and end of treatment value were calculated for individual trials, and the weighted  
135 mean difference (WMD) was used as a summary estimator. Dichotomous outcome data from  
136 individual trials were analyzed using the relative risk (RR) measure and 95% CI.

137 Heterogeneity of treatment effects between studies was investigated visually by examination  
138 of plots and statistically using the heterogeneity  $\chi^2$  and  $I^2$  statistics. In all analyses,  $P < 0.05$

139 was taken to indicate statistical significance. The fixed-effects and random-effects models  
140 were used for the meta-analysis of each indicator. Analyses were performed using Review  
141 Manager 5.2 (RevMan; Cochrane Collaboration, Oxford, UK).

142

### 143 **Trial sequential analyses**

144 To evaluate whether the present meta-analysis had a sufficient sample size to reach firm  
145 conclusions about the effects of interventions, we performed trial sequential analyses (TSAs)  
146 for outcomes, which involves a cumulative meta-analysis to create a Z curve of the  
147 summarized observed effect (the cumulative number of included patients and events) and the  
148 monitoring boundaries for benefit and harm and estimate the optimal sample size (9). When  
149 the cumulative z curve crosses the trial sequential monitoring boundary, a sufficient level of  
150 evidence for the anticipated intervention effect may have been reached. If the z curve crosses  
151 none of the boundaries and the required information size has not been reached, there is  
152 insufficient evidence to reach a conclusion. These analyses were performed using the  
153 software TSA version 0.9 Beta (Copenhagen Trial Unit, Copenhagen, Denmark).

154

### 155 **Basic information regarding the included studies**

156 After performing electronic and manual searches, 4,016 potentially relevant papers were  
157 obtained. After removing duplicated papers, 2,639 papers remained. After browsing the titles  
158 and abstracts, 53 papers were selected. After reading the entire text of these 53 papers, 24  
159 papers were excluded, and 29 papers describing 25 trials with a total of 1957 patients were  
160 ultimately included. The literature selection process is illustrated in Figure 1, and detailed  
161 information regarding the examined studies is provided in Table 1 (10-38).

162

163 **Fig. 1. Results of systematic literature search on immunosuppressive treatment for**

164 **IgAN.**



165 **Table 1. Characteristics of RCTs included in the study**

| Study           | Patient                                                                                                                                                                   | Sample size | Intervention (treatment)                                                                                                 | Intervention (control)                                     | Follow-up |
|-----------------|---------------------------------------------------------------------------------------------------------------------------------------------------------------------------|-------------|--------------------------------------------------------------------------------------------------------------------------|------------------------------------------------------------|-----------|
| Ballardie 2002  | 18 to 54 years                                                                                                                                                            | 38(19/19)   | Prednisolone 40mg/d (reduced to 10 mg/d by 2 year) + cyclophosphamide 1.5 mg/kg/day (adjusted down to the nearest 50 mg) | no immunosuppression                                       | 24M       |
| Cheng 2015      | 18-55 years old , hypertension<br><br>under control , urinary proteins<br><br>0.5-3.5 g/24h , Cr <265.2 µmol/L                                                            | 84(42/42)   | leflunomide 20mg/d + Valsartan                                                                                           | Valsartan                                                  | 24M       |
| Cruzado 2011    | 18-70 years old, eGFR 30-60ml/min/1.73m <sup>2</sup> , proteinuria >1g/d; BP>140/90mmHg with proteinuria 0.3-1g/d                                                         | 23(14/9)    | SRL 1mg/d (initial) +enalapril (or ACEI) +atorvastatin (or other statin)                                                 | Enalapril (or ACEI) +atorvastatin (or other statin)        | 12M       |
| Frisch 2005     | 18–75 years old, protein>1g/d                                                                                                                                             | 32(17/15)   | MMF 1000 mg bid +ACEI/ARB                                                                                                | Placebo + ACEI/ARB                                         | 12M       |
| Harmankaya 2002 | 13–63 years, mean Ccr 89.2 ± 10.2 ml/min<br>urinary protein excretion > 0.5 g/day, age > 16 years                                                                         | 43(21/22)   | Prednisolone 40mg/day + azathioprine 100mg/day                                                                           | no specific treatment                                      | 60M       |
| Hirai 2017      | urinary protein excretion > 0.5 g/day, age > 16 years                                                                                                                     | 42(21/21)   | MZR 150 mg once daily orally in the morning for 12 months + Standard treatment                                           | Standard treatment                                         | 36M       |
| Hogg 2015       | 7-70 years old; UPCr > 0.6 g/g (males) or>0.8 g/g (females); eGFR>50 mL/min/1.73 m <sup>2</sup> (or>40 mL/min/1.73 m <sup>2</sup> in those already receiving ACE or ARB). | 52(25/27)   | MMF 25 to 36 mg/kg/d (Max dose of 1 g/d) +lisinopril                                                                     | lisinopril or placebo 25 to 36 mg/kg/d (Max dose of 1 g/d) | 12M       |
| Julian 1993     | Ccr>25 ml/min/1.73 m <sup>2</sup>                                                                                                                                         | 35(17/18)   | prednisone                                                                                                               | no placebo                                                 | 12M       |

|                                |                                                                                                                                |           |                                                                                                                                                                                                                                                                                                                                  |                                       |     |
|--------------------------------|--------------------------------------------------------------------------------------------------------------------------------|-----------|----------------------------------------------------------------------------------------------------------------------------------------------------------------------------------------------------------------------------------------------------------------------------------------------------------------------------------|---------------------------------------|-----|
| Yoshikawa<br>1999 <sup>a</sup> | <15 Years old                                                                                                                  | 78(40/38) | Prednisolone 2 mg/kg/d in three divided doses for a total dose of not more than 80 mg/d for 4w, followed by 2 mg/kg /2d, given as a single dose in the morning of every other day for 4w, 1.5 mg/kg/2d for 4w, and 1 mg/kg/2d for 21m + azathioprine 2 mg/kg/d in a single morning dose for 24m +heparin-warfarin + dipyridamole | heparin-warfarin + dipyridamole       | 24M |
| Katafuchi<br>2003              | ≤60 years old,<br>Cr<1.5mg/dl(132.6umol/L)                                                                                     | 90(43/47) | prednisolone orally: 20 mg/d for 1 month, followed by 15 mg/d for 1 month, 10 mg/d for 1 month, 7.5 mg/d for 3 months, and 5 mg/d for 18 months + dipyridamole 150–300 mg/day                                                                                                                                                    | Dipyridamole 150–300 mg/day           | 60M |
| Kim 2013                       | 18-70 years old , serum creatinine ≤1.5 mg/dL or eGFR ≥45 ml/min/1.73 m <sup>2</sup> , UACR 0.3-3g/g creatinine, BP<130/80mmHg | 40(20/20) | Tacrolimus 0.1 mg/kg/day, 8weeks (maintain trough levels at 5–10 ng/ml) →0.05 mg/kg/day, 16weeks (maintain the trough level in 5–10 ng/ml) +RASi(9/20)                                                                                                                                                                           | RASi(11/20), placebo                  | 16W |
| Koike 2008                     | NA                                                                                                                             | 48(24/24) | initially treated with 0.4 mg/kg/day of prednisolone (20–30 mg/day) for the first 4 weeks, and the dose was gradually reduced to 10–20 mg on alternate days for the next 12 months, and then 5–10 mg on alternate days for a subsequent year                                                                                     | Dipyridamole or dilazep hydrochloride | 24M |
| Pozzi 1999 <sup>b</sup>        | 15–69 years old, urinary protein excretion of 1.0–3.5 g/d, Cr≤133 umol/L (1.5 mg/dL)                                           | 86(43/43) | methylprednisolone intravenously for 3 consecutive days; this course was repeated 2 months and 4 months later. Oral prednisone                                                                                                                                                                                                   | Supportive treatment                  | 60M |

|                        |                                                                                                        |              |                                                                                                                                                                                                                                      |                                                 |     |
|------------------------|--------------------------------------------------------------------------------------------------------|--------------|--------------------------------------------------------------------------------------------------------------------------------------------------------------------------------------------------------------------------------------|-------------------------------------------------|-----|
| Lai 1986               | 14-42 years old, IgAN & NS                                                                             | 34(17/17)    | was given at a dose of 0.5 mg/kg on alternate days for 6 months.<br>prednisone/prednisolone 40-60mg/d, reduce by half after 8 weeks                                                                                                  | Supportive therapy                              | 38M |
| Lv 2009                | 18-65 years old, urinary proteins 1-5 g/d, eGFR>30ml/min                                               | 63(33/30)    | prednisone: 0.8-1.0 mg/kg/day for 8 weeks, tapered by 5-10 mg every 2 weeks + cilazapril                                                                                                                                             | cilazapril                                      | 48M |
| Lv 2017                | proteinuria> 1 g/d, eGFR: 20-120ml/min/1.73m <sup>2</sup>                                              | 262(136/126) | oral methylprednisolone (0.6-0.8mg/kg/d; maximum, 48mg/d)                                                                                                                                                                            | placebo                                         | 60M |
| Maes 2004              | >18 years old, inulin clearance 20-70 mL/min/1.73m <sup>2</sup> , proteinuria >1 g/day, BP>140/90mmHg, | 34(21/13)    | MMF: 2g/d + ACEI                                                                                                                                                                                                                     | Placebo (identical lactose-containing capsules) | 36M |
| Manno 2009             | 16-70 years old, proteinuria>1g/d, eGFR≥50ml/min/1.73m <sup>2</sup>                                    | 97(48/49)    | prednisone: 1.0 mg/kg/day(Max: 75 mg/day) for 2 months, tapered by 0.2 mg/kg/day every month<br>ramipril                                                                                                                             | ramipril                                        | 5Y  |
| Rauen 2015             | proteinuria>0.75g/d after 6 months support treatment                                                   | 162(82/80)   | Supportive Care (100%) + Immunosuppression                                                                                                                                                                                           | RASi (77/80)                                    | 36M |
| Shoji 2000             | 15-55 years old, proteinuria less than 1.5 g/d, serum creatinine level less than 1.5 mg/dL             | 19(11/8)     | prednisolone 0.8 mg/kg of body weight; this was gradually reduced to a daily dose of 0.4 mg/kg of body weight during the first month of therapy, and then tapered to 10 mg very other day for the remainder of the 1 year of therapy | Dipyridamole 300 mg/day                         | 12M |
| Tang 2005 <sup>c</sup> | urinary proteins>1g/d, BP<125/85mmHg, Cr<300umol/L(3.4mg/dl)                                           | 40(20/20)    | MMF 2 g/day (weight≥60kg), 1.5g/day(weight<60kg) +ACEI/ARB(16:4)                                                                                                                                                                     | ACEI/ARB (14:6)                                 | 72W |

|             |                                                                                                                              |              |                                                                                                                                                  |                                                                                                                                                     |     |
|-------------|------------------------------------------------------------------------------------------------------------------------------|--------------|--------------------------------------------------------------------------------------------------------------------------------------------------|-----------------------------------------------------------------------------------------------------------------------------------------------------|-----|
| Walker 1990 | 24h pro>1.0g/d,<br>120umol/L<Cr<200umol/L<br>one or more                                                                     | 52(25/27)    | Cyclophosphamide (1-2 mg/kg/24h -<br>maximum of 100 mg/24h and adjusted<br>according to peripheral white cell counts)<br>+dipyridamole +warfarin | no treatment                                                                                                                                        | 2Y  |
| Wu 2016     | 18–55 years, proteinuria of 0.5–3.5<br>g/d, serum creatinine <265 μmol/L,<br>blood pressure between 90/60 and<br>130/80 mmHg | 399(100/299) | Leflunomide 20 mg/d + telmisartan +<br>clopidogrel placebo                                                                                       | Telmisartan + Leflunomide<br>placebo + clopidogrel<br>placebo & Telmisartan<br>+clopidogrel + Leflunomide<br>placebo & Telmisartan +<br>clopidogrel | 24w |
| Xie 2011    | 14-70 years old, urinary protein<br>excretion: 0.5 to 3.5 g/24 h, Cr<br><353.6 umol/L                                        | 64(34/30)    | MZR 200mg/d(weight<50kg),<br>250mg/d(weight>50kg), 150mg/d(Cr>176.8<br>umol/L) +losartan                                                         | Losartan                                                                                                                                            | 12M |
| Woo 1987    |                                                                                                                              | 48(27/21)    | cyclophosphamide 1.5 mg/kg per day+<br>dipyridamole + warfarin                                                                                   | No treatment                                                                                                                                        | 36M |

166 **Abbreviations:** NA: not applicable; MMF: mycophenolate mofetil; SRL: sirolimus; MZR: mizoribine.

167 <sup>a</sup>Kamei 2011 and Yoshikawa 1999 describe the same trial, but the available data provided by the articles are different. Here, only the data of Yoshikawa  
168 1999 are listed.

169 <sup>b</sup>Locatelli 2001 and Pozzi 2004 were follow-up studies of Pozzi 1999, and only the data of Pozzi 1999 are listed here.

170 <sup>c</sup>Tang 2010 was a follow-up study of Tang 2005, and only the data of Tang 2005 are listed here.

171 **Quality of trials**

172 By current standards, reporting of key indicators of trial quality was suboptimal. Some  
173 studies in particular provided few details on the process of randomization and concealment of  
174 allocation. Only six studies were double-blinded trials. Seven studies used an open-label  
175 design. The bias and overall risk diagrams of the included studies are presented in Figure 2.

176

177 **Fig. 2. Risk of bias graph.**

178

179 **Effects on proteinuria**

180 The difference in the means of urinary protein excretion between end of treatment and  
181 baseline was significantly lower in the steroid group than in controls (five trials (17, 21-23,  
182 31), 222 patients; WMD  $-0.51$ , 95% CI  $-0.73$  to  $-0.28$ , with a fixed-effects model; WMD  
183  $-0.70$ , 95% CI  $-1.2$  to  $-0.20$ , with a random-effects model;  $I^2=58\%$ ; Fig. 3). After removing  
184 Lai (22), heterogeneity  $I^2$  changed to 0.

185 Patients receiving NSI alone showed a more significant reduction of urinary protein excretion  
186 after treatment compared to controls (seven trials (12, 26, 32, 34-37), 660 patients, WMD  
187  $-0.43$ , 95% CI  $-0.55$  to  $0.31$ , with a fixed-effects model; WMD  $-0.43$ , 95% CI  $-0.55$  to  
188  $-0.31$ , with a random-effects model;  $I^2=0$ ; Fig. 3).

189 With the S&NSI treatment approach, patients had a more significant reduction of urinary  
190 protein excretion after treatment compared to controls (three trials (10, 30, 38), 278 patients,  
191 WMD  $-0.16$ , 95% CI  $-1.8$  to  $-1.4$ ,  $I^2=83\%$ , with a fixed-effects model; WMD  $-1.42$ , 95% CI  
192  $-2.18$  to  $-0.66$ ,  $I^2=89\%$ , with a random-effects model; Fig. 3). After removing Yoshikawa  
193 (38), heterogeneity  $I^2$  changed to 0.

194 TSAs of steroids, NSI, and S&NSI all indicated that the cumulative z curve crossed both the  
195 conventional boundary and the trial sequential monitoring boundary (Fig. 4).

196

197 **Fig. 3. Effects of immunosuppressive agents on proteinuria in patients with IgAN.**

198 CI, confidence interval.

199

200 **Fig. 4. Trial sequential analyses of proteinuria.**

201 a) Five comparisons between steroids and controls.

202 b) Seven comparisons between NSI and controls.

203 c) Three comparisons between S&NSI and controls.

204 **Effects on renal function and renal survival**

205 **Creatinine**

206 There were no statistically significant differences in creatinine changes between baseline and  
207 end of treatment between immunosuppressive treatment and control groups (nine trials (11,  
208 13, 17, 19, 20, 22, 26, 31, 34), 420 patients, WMD  $-0.03$ , 95% CI  $-0.11$  to  $0.15$ , with a  
209 fixed-effects model; WMD  $-0.03$ , 95% CI  $-0.11$  to  $0.05$ , with a random-effects model;  
210  $I^2=0\%$ ; Fig. 5).

211 TSAs of nine comparisons illustrated that the cumulative z curve did not cross the  
212 conventional boundary or the line of required information size, indicating that the evidence  
213 was insufficient. Therefore, further trials are required.

214

215 **Fig. 5. Effects of immunosuppressive agents on creatinine levels in patients with IgAN.**

216 CI, confidence interval.

217

218 **eGFR**

219 The differences in the means of eGFR between end of treatment and baseline were  
220 significantly higher in the NSI group than in controls (five trials (16, 20, 25, 36, 37), 817  
221 patients; WMD  $5.17$ , 95% CI  $3.18$  to  $7.16$ , with a fixed-effects model; WMD  $5.17$ , 95% CI  
222  $3.18$  to  $7.16$ , with a random-effects model;  $I^2=0\%$ ; Fig. 6). TSAs of five comparisons  
223 indicated that the cumulative z curve crossed the conventional boundary, but did not cross the  
224 trial sequential monitoring boundary.

225 However, when the steroid and S&NSI groups were added, there were no significant

226 differences in eGFR changes in immunosuppressive treatment compared to controls (seven

227 trials (16, 20, 25, 30, 31, 36, 37), 998 patients, WMD 0.26, 95% CI –0.03 to 0.56, with a  
228 fixed-effects model; WMD 2.52, 95% CI –0.49 to 0.53, with a random-effects model;  
229  $I^2=76%$ ; Fig. 6). TSAs of seven comparisons indicated that the cumulative z curve did not  
230 cross the conventional boundary or the line of required information size.

231

232 **Fig. 6. Effects of immunosuppressive agents on estimated glomerular filtration rate in**  
233 **patients with IgAN.**

234 CI, confidence interval.

235

236 **ESRD**

237 There was a lower risk of reaching ESRD in the immunosuppressive treatment group than in  
238 controls (12 trials (13, 17-19, 24-28, 30, 33, 34), 1031 patients; RR 0.51, 95% CI 0.33 to 0.08,  
239 with a fixed-effects model; RR 0.55, 95% CI 0.33–0.90, with a random-effects model;  $I^2=8$ ;  
240 Fig. 6). These analyses were dominated by the steroid treatment group (Fig. 7).

241 TSAs of steroids indicated that the cumulative z curve crossed both the conventional  
242 boundary and the trial sequential monitoring boundary.

243

244 **Fig. 7. Effects of immunosuppressive agents on end-stage renal disease in patients with**  
245 **IgAN.**

246 CI, confidence interval; RR, relative risk.

247

248 **Adverse events of treatment**

249 A total of 20 articles reported adverse events during the observation period. The types of



250 adverse events varied widely, and included infection, cardiovascular disease, respiratory  
251 disease, hepatotoxicity, and many others; the 12 most commonly reported are listed in Table  
252 2. As the number of infections reported in Rauen (30) was greater than the total number, RR  
253 could not be calculated for infections. TSAs of infection, gastrointestinal disease,  
254 hematological disease, dermatological disease, impaired glucose tolerance or diabetes  
255 mellitus, and hyperkalemia indicated that the cumulative z curve crossed the conventional  
256 boundary but did not cross the trial sequential monitoring boundary. In addition, TSAs of the  
257 other six diseases indicated that the cumulative z curve did not cross the conventional  
258 boundary or the line of required information size.

259 **Table 2. Main adverse events reported in the included RCTs**

260

261

262

263

264

265

| Main adverse events                             | No. of studies | Immunosuppressive agent group | Control group | RR (95% CI)        |                   | P value       |               |
|-------------------------------------------------|----------------|-------------------------------|---------------|--------------------|-------------------|---------------|---------------|
|                                                 |                |                               |               | FE                 | RE                | FE            | RE            |
|                                                 |                |                               |               | Gastrointestinal   | 11                | 38/431        | 8/606         |
| Hematologic                                     | 9              | 16/373                        | 6/551         | 2.17 [1.00, 4.68]  | 2.0[0.84, 4.77]   | 0.05          | 0.12          |
| Dermatologic                                    | 7              | 16/273                        | 3/463         | 4.09 [1.57, 10.66] | 3.88[1.41, 10.64] | 0.004         | 0.009         |
| Hepatotoxicity                                  | 7              | 21/455                        | 19/636        | 1.26 [0.72, 2.22]  | 1.26[0.70, 2.24]  | 0.42          | 0.44          |
| Respiratory                                     | 6              | 9/371                         | 12/544        | 0.81 [0.37, 1.74]  | 0.82[0.37, 1.82]  | 0.58          | 0.62          |
| Infection                                       | 6              | 189/373                       | 114/547       | Not estimable      | Not estimable     | Not estimable | Not estimable |
| Impaired glucose tolerance or diabetes mellitus | 5              | 15/326                        | 5/316         | 2.61 [1.04, 6.55]  | 2.16[0.77, 6.05]  | 0.04          | 0.14          |
| BP↑                                             | 4              | 14/193                        | 16/389        | 0.96 [0.52, 1.79]  | 0.97[0.43, 2.22]  | 0.9           | 0.95          |
| Malignant                                       | 4              | 4/167                         | 2/157         | 1.40 [0.39, 4.98]  | 1.33[0.30, 5.93]  | 0.61          | 0.71          |
| Musculoskeletal                                 | 3              | 5/238                         | 3/226         | 1.47 [0.44, 4.93]  | 1.37[0.40, 4.71]  | 0.53          | 0.62          |
| Hyperkalemia                                    | 3              | 2/156                         | 11/350        | 0.23 [0.07, 0.71]  | 0.3[0.05, 1.98]   | 0.01          | 0.21          |
| Genitourinary                                   | 3              | 6/59                          | 0/56          | 4.59 [0.85, 24.85] | 4.07[0.71, 23.39] | 0.08          | 0.12          |

282 RR: Relative Risk; CI: Confidence Intervals; FE: Fixed Effect Model; RE: Random Effect Model

## 283 **Conclusions**

284 Farnsworth (39) and Barnett (40) first used corticotropin between 1949 and 1950 for the  
285 treatment of lipoid nephrosis, which is now known as minimal change disease or childhood  
286 nephrotic syndrome. Chasis *et al.* (41) used nitrogen mustard to treat chronic  
287 glomerulonephritis and achieved good initial results, thus pioneering the use of  
288 immunosuppressive agents for the treatment of nephropathy. Immunosuppressive agents have  
289 been used for the treatment of kidney diseases for about 70 years. However, the outcomes  
290 immunosuppressive therapy for IgAN are controversial. Therefore, we included 29 reports  
291 published between 1986 and 2017 in a meta-analysis of the efficacy and safety of  
292 immunosuppressive treatment and control treatment in IgAN.

293

## 294 **Alleviation of proteinuria**

295 Previous studies have suggested that treatment with steroids or alkylating agents can  
296 significantly reduce proteinuria levels in patients with IgAN (42-44). Our meta-analysis also  
297 showed that immunosuppressive agents can significantly reduce the level of proteinuria. The  
298 levels of proteinuria in groups treated with steroids, NSI, or S&NSI were significantly  
299 reduced compared to controls. The heterogeneity of the steroid group was mainly derived  
300 from Lai (22), in which the inclusion criterion included nephrotic syndrome. In addition, the  
301 heterogeneity of the S&NSI group was mainly derived from Yoshikawa (38), in which the  
302 inclusion criterion included age < 15 years. Sequential analyses showed that  
303 immunosuppressive agents were effective for relieving proteinuria, and no additional sample  
304 size was required.

305

## 306 **Reducing the risk for ESRD**

307 Our results suggest that non-steroidal immunosuppressive therapy may have a positive effect  
308 on eGFR. However, sequential analyses suggested that this is still inconclusive and further  
309 studies are required for confirmation. In addition, the treatment group showed a greater  
310 reduction in the risk for ESRD than the control group, and this effect was mainly due to the  
311 steroid treatment group. Sequential analyses showed that steroids could reduce the risk for  
312 ESRD without the need for a larger sample size. A relevant study (43) also suggested that  
313 high-dose short-course steroid therapy has a significant protective effect on renal function,  
314 while a low-dose long-course of steroids does not. Further studies are required to determine  
315 whether NSI or S&NSI can reduce the risk for ESRD.

316

## 317 **More adverse events**

318 The use of immunosuppressive agents is often accompanied by side effects. The  
319 immunosuppressive therapy group showed significant increases in gastrointestinal,  
320 hematological, dermatological, and genitourinary side effects, as well as impaired glucose  
321 tolerance or diabetes in this meta-analysis. As the number of infection events reported in the  
322 STOP study was too high, even exceeding the total number of patients, it was not possible to  
323 calculate the RR value. However, across all studies, the proportion of infections reported was  
324 still higher in the immunosuppressive therapy group than in controls. In addition, the  
325 TESTING study had to be discontinued because of the excessive number of serious adverse  
326 events, mostly infections. By contrast, hyperkalemia was more common in the control group,  
327 which may have been related to the application of ACEI and ARB. However, it should be  
328 noted that sequential analyses indicated that the statistical results of the above adverse events

329 should be verified by further experiments.

330

### 331 **Strengths and limitations**

332 Our study had several limitations that should be taken into consideration. The results of bias  
333 analyses indicated that nearly half of the studies did not explicitly report the methods used for  
334 randomization. In addition, few studies used blinded methodologies. The quality of the  
335 reports in the literature is unsatisfactory. In addition, there were some differences in the  
336 inclusion criteria between each study, such as age, proteinuria level, and renal function, and  
337 these confounding factors led to a high degree of data heterogeneity.

338

339 In conclusion, immunosuppressants significantly reduce proteinuria and decrease the risk for  
340 ESRD but also increase the risk for serious adverse reactions. Therefore, if it is necessary to  
341 use immunosuppressive agents, clinicians should evaluate the patient on an individual basis  
342 according to their own conditions before treatment. In the course of using  
343 immunosuppressive agents, close observation should be carried out to prevent and control  
344 complications. In addition, further well-designed and high-quality RCTs are needed to  
345 explore the applicability and optimal methods of immunosuppressant treatment.

346

347

348 **The English in this document has been checked by at least two professional editors, both**  
349 **native speakers of English. For a certificate, please see:**

350 <http://www.textcheck.com/certificate/gC26x1>

1. Wyatt RJ, Julian BA. IgA nephropathy. *N Engl J Med*. 2013;368(25):2402-14.
2. McGrogan A, Franssen CF, de Vries CS. The incidence of primary glomerulonephritis worldwide: a systematic review of the literature. *Nephrol Dial Transplant*. 2011;26(2):414-30.
3. Cattran DC, Feehally J, Cook HT, Liu ZH, Fervenza FC, Mezzano SA, et al. Kidney disease : Improving global outcomes (KDIGO) glomerulonephritis work group. KDIGO clinical practice guideline for glomerulonephritis. *Kidney International Supplements*. 2012;2(2):139-274.
4. J.P.T. Higgins G. *Cochrane Handbook for systematic reviews of interventions*, version 5.1.0, 2011. Available from: <http://www.cochrane.org/handbook>.
5. Moher D, Liberati A, Tetzlaff J, Altman DG. Preferred reporting items for systematic reviews and meta-analyses: the PRISMA statement. *BMJ*. 2009;339.
6. Higgins J GS. *Cochrane handbook for systematic reviews of interventions version 5.0. 2* [updated September 2009]. The Cochrane Collaboration, 2009. 2010; Available from [www.cochrane-handbook.org](http://www.cochrane-handbook.org); 2010.
7. Wong SS, Wilczynski NL, Haynes RB. Developing optimal search strategies for detecting clinically sound treatment studies in EMBASE. *J Med Libr Assoc*. 2006;94(1):41-7.
8. Higgins JP, Altman DG, Gotzsche PC, Juni P, Moher D, Oxman AD, et al. The Cochrane Collaboration's tool for assessing risk of bias in randomised trials. *Bmj*. 2011;343:d5928.
9. Wetterslev J, Thorlund K, Brok J, Gluud C. Trial sequential analysis may establish when firm evidence is reached in cumulative meta-analysis. *Journal of clinical epidemiology*. 2008;61(1):64-75.
10. Ballardie FW, Roberts ISD. Controlled prospective trial of prednisolone and cytotoxics in progressive IgA nephropathy. *Journal of the American Society of Nephrology*. 2002;13(1):142-8.
11. Cheng G, Liu D, Margetts P, Liu L, Zhao Z, Liu Z, et al. Valsartan combined with clopidogrel and/or leflunomide for the treatment of progressive immunoglobulin A nephropathy. *Nephrology (Carlton)*. 2015;20(2):77-84.
12. Cruzado JM, Poveda R, Ibernón M, Díaz M, Fulladosa X, Carrera M, et al. Low-dose sirolimus combined with angiotensin-converting enzyme inhibitor and statin stabilizes renal function and reduces glomerular proliferation in poor prognosis IgA nephropathy. *Nephrology Dialysis Transplantation*. 2011;26(11):3596-602.
13. Frisch G, Lin J, Rosenstock J, Markowitz G, D'Agati V, Radhakrishnan J, et al. Mycophenolate mofetil (MMF) vs placebo in patients with moderately advanced IgA nephropathy: a double-blind randomized controlled trial. *Nephrology, dialysis, transplantation [Internet]*. 2005; 20(10):[2139-45 pp.]. Available from: <http://cochranelibrary-wiley.com/o/cochrane/elcentral/articles/999/CN-00528999/frame.html>.
14. Harmankaya O, Ozturk Y, Basturk T, Obek A, Kilicarslan I. Efficacy of

immunosuppressive therapy in IgA nephropathy presenting with isolated hematuria. *Int Urol Nephrol*. 2002;33(1):167-71.

15. Hirai K, Ookawara S, Kitano T, Miyazawa H, Ito K, Ueda Y, et al. Efficacy and safety of adding mizoribine to standard treatment in patients with immunoglobulin A nephropathy: A randomized controlled trial. *Kidney Res Clin Pract*. 2017;36(2):159-66.
16. Hogg RJ, Bay RC, Jennette JC, Sibley R, Kumar S, Fervenza FC, et al. Randomized Controlled Trial of Mycophenolate Mofetil in Children, Adolescents, and Adults With IgA Nephropathy. *American Journal of Kidney Diseases*. 2015;66(5):783-91.
17. Julian BA, Barker C. Alternate-day prednisone therapy in IgA nephropathy. Preliminary analysis of a prospective, randomized, controlled trial. *Contrib Nephrol*. 1993;104:198-206.
18. Kamei K, Nakanishi K, Ito S, Saito M, Sako M, Ishikura K, et al. Long-term results of a randomized controlled trial in childhood IgA nephropathy. *Clinical Journal of the American Society of Nephrology*. 2011;6(6):1301-7.
19. Katafuchi R, Ikeda K, Mizumasa T, Tanaka H, Ando T, Yanase T, et al. Controlled, prospective trial of steroid treatment in IgA nephropathy: a limitation of low-dose prednisolone therapy. *Am J Kidney Dis*. 2003;41(5):972-83.
20. Kim YC, Chin HJ, Koo HS, Kim S. Tacrolimus decreases albuminuria in patients with IgA nephropathy and normal blood pressure: a double-blind randomized controlled trial of efficacy of tacrolimus on IgA nephropathy. *PLoS One*. 2013;8(8):e71545.
21. Koike M, Takei T, Uchida K, Honda K, Moriyama T, Horita S, et al. Clinical assessment of low-dose steroid therapy for patients with IgA nephropathy: a prospective study in a single center. *Clin Exp Nephrol*. 2008;12(4):250-5.
22. Lai KN, Lai FM, Ho CP, Chan KW. Corticosteroid therapy in IgA nephropathy with nephrotic syndrome: A long-term controlled trial. *Clinical Nephrology*. 1986;26(4):174-80.
23. Locatelli F, Pozzi C, Del Vecchio L, Bolasco PG, Fogazzi GB, Andrulli S, et al. Role of proteinuria reduction in the progression of IgA nephropathy. *Ren Fail*. 2001;23(3-4):495-505.
24. Lv J, Zhang H, Chen Y, Li G, Jiang L, Singh AK, et al. Combination therapy of prednisone and ACE inhibitor versus ACE-inhibitor therapy alone in patients with IgA nephropathy: a randomized controlled trial. *Am J Kidney Dis*. 2009;53(1):26-32.
25. Lv J, Zhang H, Wong MG, Jardine MJ, Hladunewich M, Jha V, et al. Effect of Oral Methylprednisolone on Clinical Outcomes in Patients With IgA Nephropathy: The TESTING Randomized Clinical Trial. *JAMA*. 2017;318(5):432-42.
26. Maes BD, Oyen R, Claes K, Evenepoel P, Kuypers D, Vanwalleghem J, et al. Mycophenolate mofetil in IgA nephropathy: Results of a 3-year prospective placebo-controlled randomized study. *Kidney International*. 2004;65(5):1842-9.
27. Manno C, Torres DD, Rossini M, Pesce F, Schena FP. Randomized

- controlled clinical trial of corticosteroids plus ACE-inhibitors with long-term follow-up in proteinuric IgA nephropathy. *Nephrol Dial Transplant*. 2009;24(12):3694-701.
28. Pozzi C, Andrulli S, Del Vecchio L, Melis P, Fogazzi GB, Altieri P, et al. Corticosteroid effectiveness in IgA nephropathy: long-term results of a randomized, controlled trial. *J Am Soc Nephrol*. 2004;15(1):157-63.
29. Pozzi C, Bolasco P, Fogazzi G, Andrulli S, Altieri P, Ponticelli C, et al. Corticosteroids in IgA nephropathy: A randomised controlled trial. *Lancet*. 1999;353(9156):883-7.
30. Rauen T, Eitner F, Fitzner C, Sommerer C, Zeier M, Otte B, et al. Intensive Supportive Care plus Immunosuppression in IgA Nephropathy. *N Engl J Med*. 2015;373(23):2225-36.
31. Shoji T, Nakanishi I, Suzuki A, Hayashi T, Togawa M, Okada N, et al. Early treatment with corticosteroids ameliorates proteinuria, proliferative lesions, and mesangial phenotypic modulation in adult diffuse proliferative IgA nephropathy. *Am J Kidney Dis*. 2000;35(2):194-201.
32. Tang S, Leung JC, Chan LY, Lui YH, Tang CS, Kan CH, et al. Mycophenolate mofetil alleviates persistent proteinuria in IgA nephropathy. *Kidney international* [Internet]. 2005; 68(2):[802-12 pp.]. Available from: <http://cochranelibrary-wiley.com/o/cochrane/clcentral/articles/164/CN-00523164/frame.html>.
33. Tang SCW, Tang AWC, Wong SSH, Leung JCK, Ho YW, Lai KN. Long-term study of mycophenolate mofetil treatment in IgA nephropathy. *Kidney International*. 2010;77(6):543-9.
34. Walker RG, Yu SH, Owen JE, Kincaid-Smith P. The treatment of mesangial IgA nephropathy with cyclophosphamide, dipyridamole and warfarin: a two-year prospective trial. *Clin Nephrol*. 1990;34(3):103-7.
35. Woo KT, Edmondson RP, Yap HK, Wu AY, Chiang GS, Lee EJ, et al. Effects of triple therapy on the progression of mesangial proliferative glomerulonephritis. *Clin Nephrol*. 1987;27(2):56-64.
36. Wu J, Duan SW, Sun XF, Li WG, Wang YP, Liu WH, et al. Efficacy of Leflunomide, Telmisartan, and Clopidogrel for Immunoglobulin A Nephropathy: A Randomized Controlled Trial. *Chin Med J (Engl)*. 2016;129(16):1894-903.
37. Xie Y, Huang S, Wang L, Miao L, Zhang A, Li Y, et al. Efficacy and safety of mizoribine combined with losartan in the treatment of IgA nephropathy: a multicenter, randomized, controlled study. *American journal of the medical sciences* [Internet]. 2011; 341(5):[367-72 pp.]. Available from: <http://cochranelibrary-wiley.com/o/cochrane/clcentral/articles/297/CN-00787297/frame.html>.
38. Yoshikawa N, Ito H, Sakai T, Takekoshi Y, Honda M, Awazu M, et al. A controlled trial of combined therapy for newly diagnosed severe childhood IgA nephropathy. *Journal of the American Society of Nephrology*. 1999;10(1):101-9.



39. Farnsworth EB. Metabolic changes associated with administration of adrenocorticotropin in the nephrotic syndrome. *Proceedings of the Society for Experimental Biology and Medicine Society for Experimental Biology and Medicine* (New York, NY). 1950;74(1):60-2.
40. Barnett HL, Mc NH, Mc CW, Forman C, Rapoport M, Michie A, et al. The effects of ACTH and cortisone on the nephrotic syndrome. *AMA American journal of diseases of children*. 1950;80(3):519-20.
41. Chasis H, Goldring W, Baldwin DS. Effect of febrile plasma, typhoid vaccine and nitrogen mustard on renal manifestations of human glomerulonephritis. *Proceedings of the Society for Experimental Biology and Medicine Society for Experimental Biology and Medicine* (New York, NY). 1949;71(4):565-7.
42. Zhou YH, Tang LG, Guo SL, Jin ZC, Wu MJ, Zang JJ, et al. Steroids in the treatment of IgA nephropathy to the improvement of renal survival: a systematic review and meta-analysis. *PLoS One*. 2011;6(4):e18788.
43. Lv J, Xu D, Perkovic V, Ma X, Johnson DW, Woodward M, et al. Corticosteroid therapy in IgA nephropathy. *J Am Soc Nephrol*. 2012;23(6):1108-16.
44. Cheng J, Zhang X, Zhang W, He Q, Tao X, Chen J. Efficacy and safety of glucocorticoids therapy for IgA nephropathy: a meta-analysis of randomized controlled trials. *Am J Nephrol*. 2009;30(4):315-22.

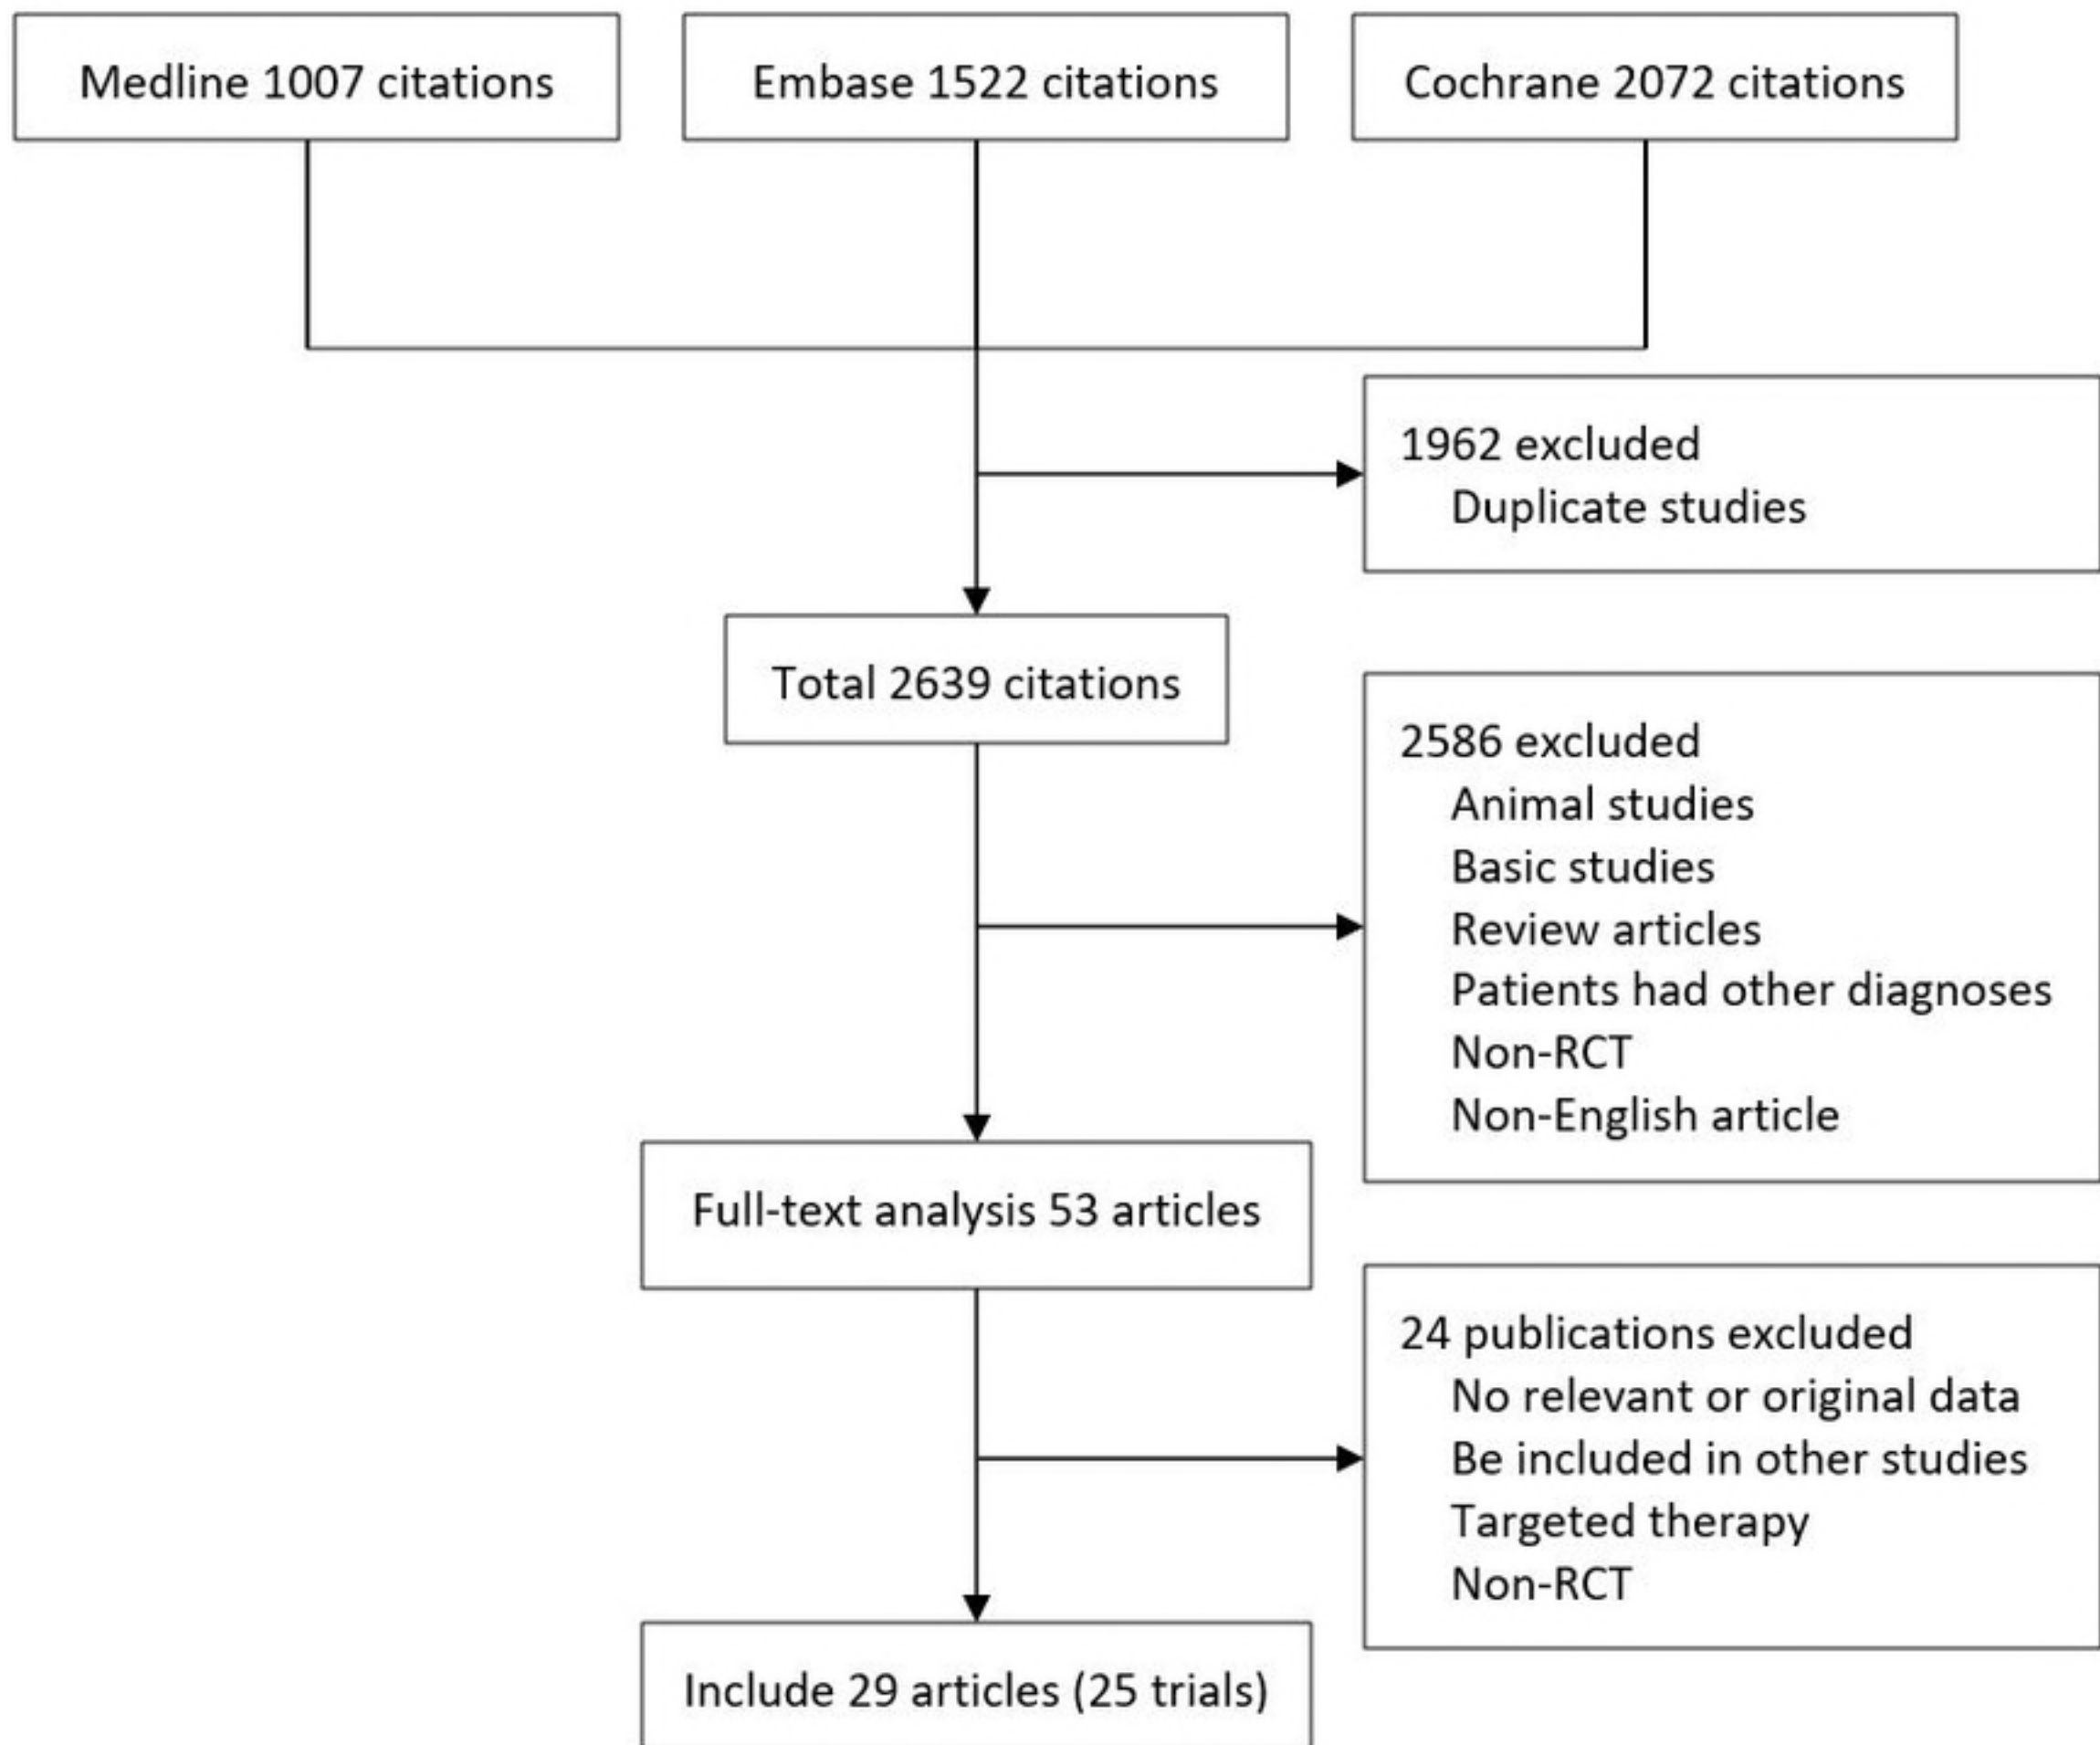

Fig.1

|                 |                                             |                                         |                                                           |                                                 |                                          |                                      |            |
|-----------------|---------------------------------------------|-----------------------------------------|-----------------------------------------------------------|-------------------------------------------------|------------------------------------------|--------------------------------------|------------|
| Ballardie 2002  | ?                                           | ?                                       | ?                                                         | +                                               | ?                                        | +                                    |            |
| Cheng 2015      | +                                           | +                                       | +                                                         | +                                               | ?                                        | +                                    |            |
| Cruzado 2011    | +                                           | ?                                       | ?                                                         | +                                               | ?                                        | +                                    |            |
| Frisch 2005     | +                                           | +                                       | +                                                         | +                                               | -                                        | +                                    |            |
| Harmankaya 2002 | ?                                           | ?                                       | ?                                                         | +                                               | ?                                        | +                                    |            |
| Hirai 2017      | ?                                           | ?                                       | ?                                                         | +                                               | ?                                        | +                                    |            |
| Hogg 2015       | +                                           | +                                       | +                                                         | +                                               | -                                        | +                                    |            |
| Julian 1993     | +                                           | +                                       | ?                                                         | +                                               | +                                        | +                                    |            |
| Kamei 2011      | ?                                           | ?                                       | ?                                                         | ?                                               | ?                                        | +                                    |            |
| Katafuchi 2003  | ?                                           | ?                                       | ?                                                         | ?                                               | -                                        | +                                    |            |
| Kim 2013        | +                                           | +                                       | +                                                         | +                                               | +                                        | +                                    |            |
| Koike 2008      | ?                                           | ?                                       | -                                                         | ?                                               | ?                                        | +                                    |            |
| Locatelli 2001  | ?                                           | ?                                       | ?                                                         | +                                               | +                                        | +                                    |            |
| Lv 2009         | +                                           | +                                       | -                                                         | ?                                               | +                                        | +                                    |            |
| Lv 2017         | +                                           | +                                       | +                                                         | +                                               | ?                                        | +                                    |            |
| Maes 2004       | ?                                           | ?                                       | ?                                                         | ?                                               | ?                                        | +                                    |            |
| Manno 2009      | +                                           | +                                       | -                                                         | ?                                               | -                                        | +                                    |            |
| Pozzi 1999      | +                                           | +                                       | ?                                                         | ?                                               | +                                        | +                                    |            |
| Pozzi 2004      | ?                                           | ?                                       | ?                                                         | ?                                               | +                                        | +                                    |            |
| Rauen 2015      | +                                           | +                                       | -                                                         | ?                                               | +                                        | +                                    |            |
| Shoji 2000      | +                                           | +                                       | ?                                                         | ?                                               | ?                                        | +                                    |            |
| Tang 2005       | ?                                           | ?                                       | ?                                                         | ?                                               | +                                        | +                                    |            |
| Tang 2010       | +                                           | -                                       | -                                                         | ?                                               | +                                        | +                                    |            |
| Walker 1990     | ?                                           | ?                                       | ?                                                         | ?                                               | ?                                        | +                                    |            |
| Woo 1987        | ?                                           | ?                                       | -                                                         | ?                                               | +                                        | +                                    |            |
| Wu 2016         | +                                           | +                                       | +                                                         | ?                                               | ?                                        | +                                    |            |
| Xie 2011        | ?                                           | ?                                       | -                                                         | ?                                               | ?                                        | +                                    |            |
| Yoshikawa 1999  | +                                           | +                                       | ?                                                         | ?                                               | ?                                        | +                                    |            |
|                 | Random sequence generation (selection bias) | Allocation concealment (selection bias) | Blinding of participants and personnel (performance bias) | Blinding of outcome assessment (detection bias) | Incomplete outcome data (attrition bias) | Selective reporting (reporting bias) | Other bias |

Fig.2

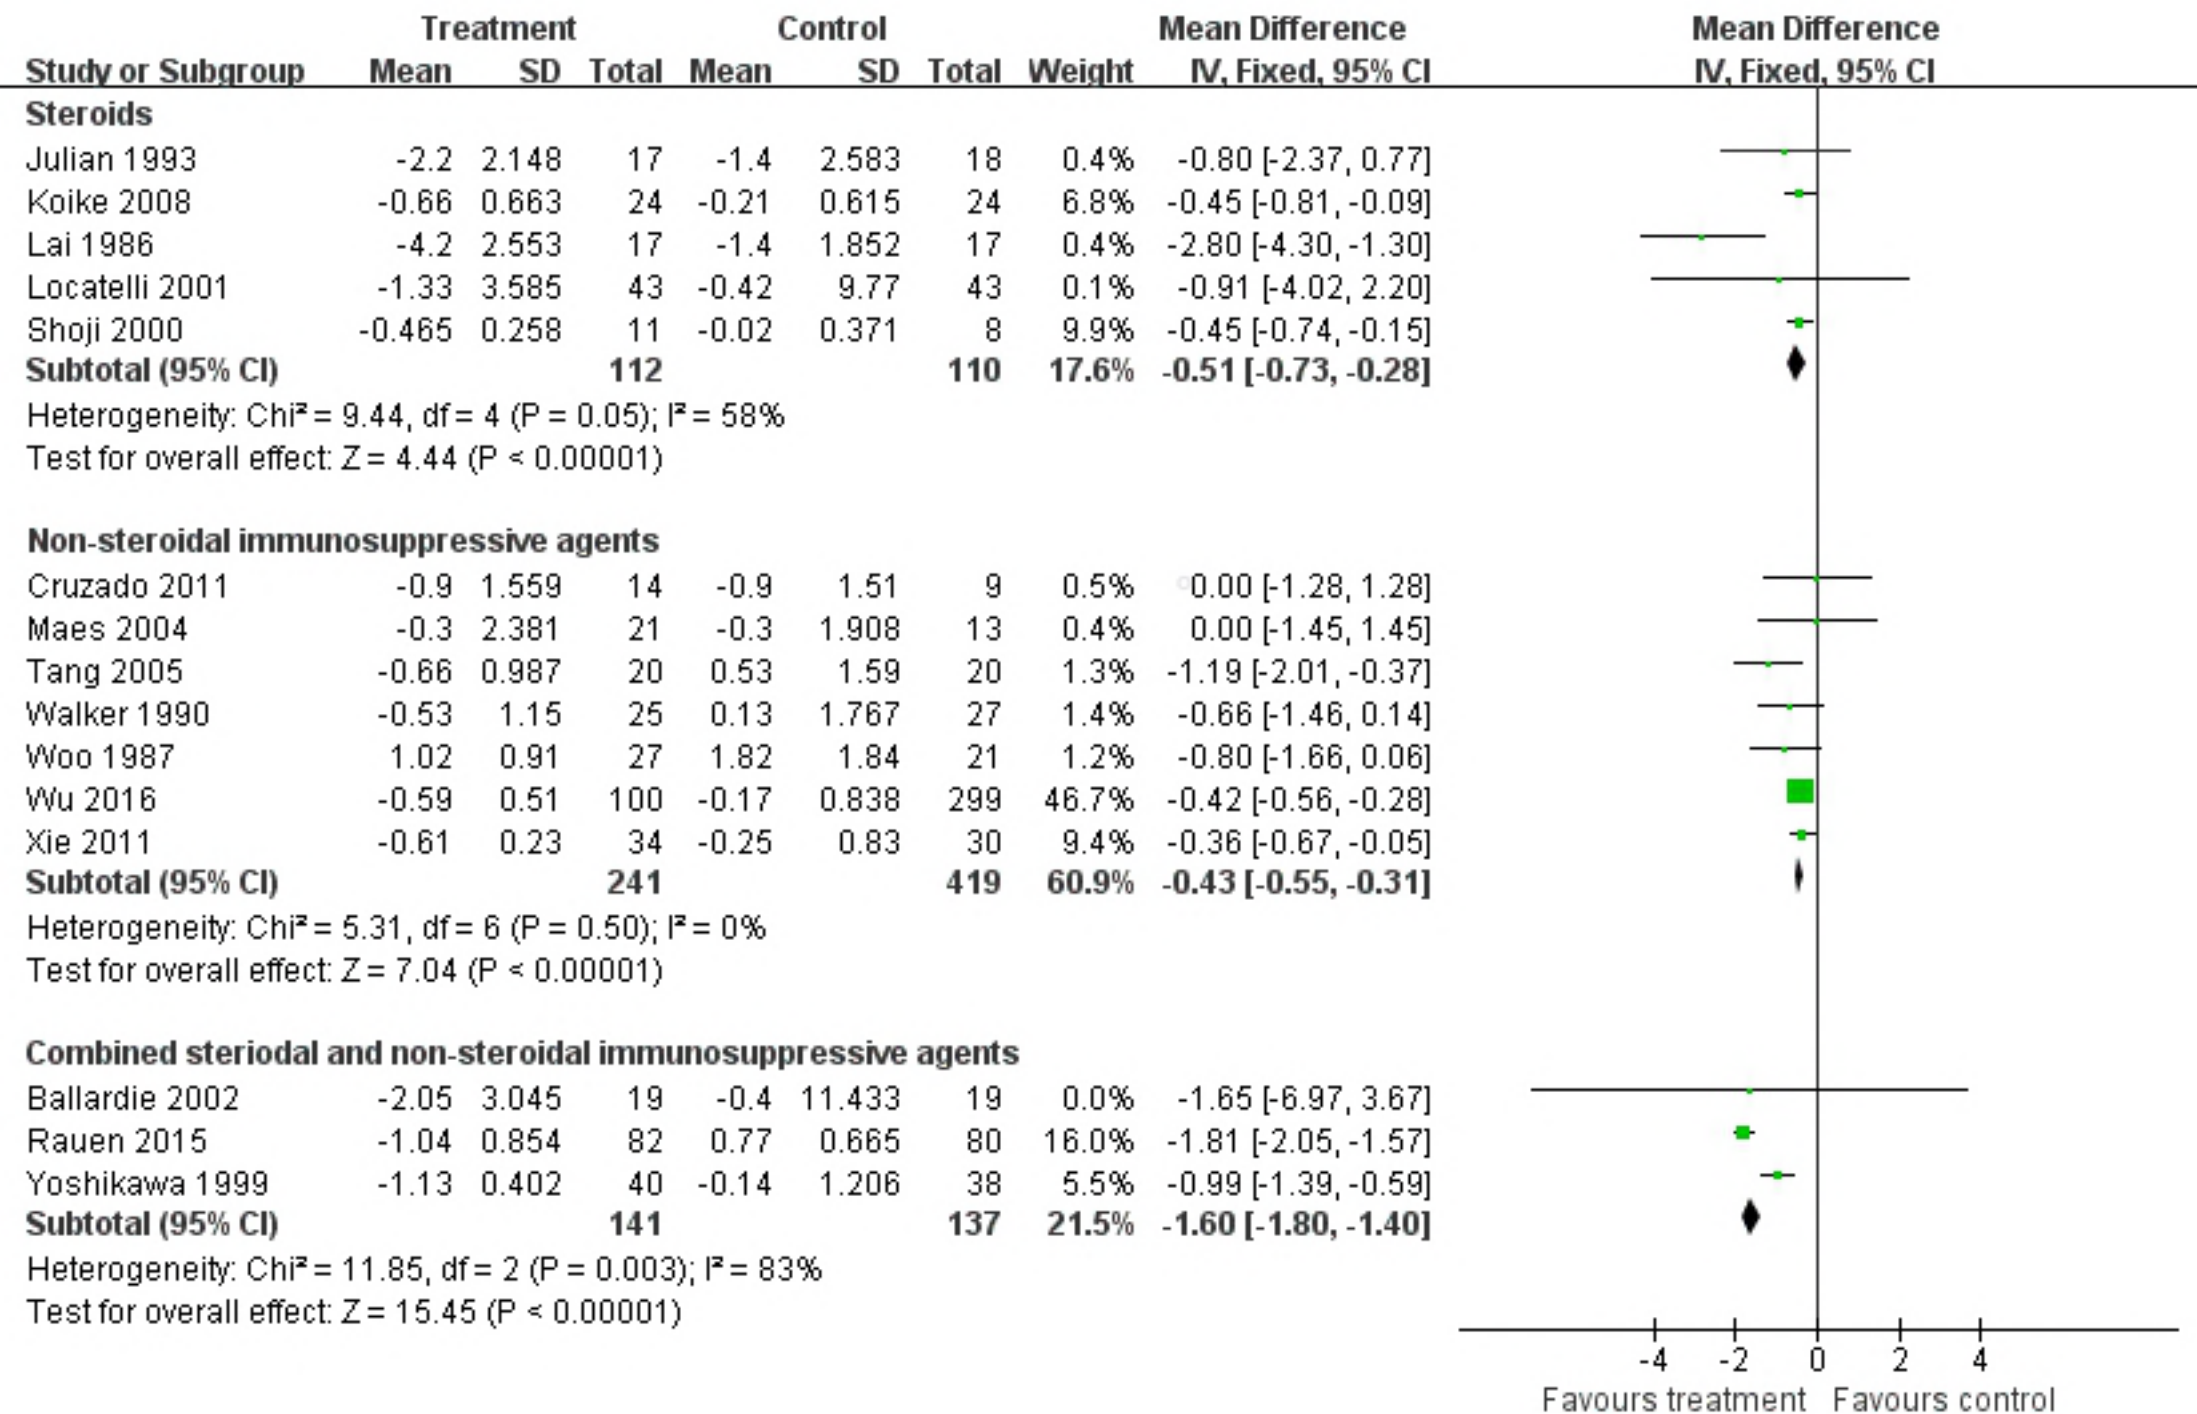

Fig.3

**a**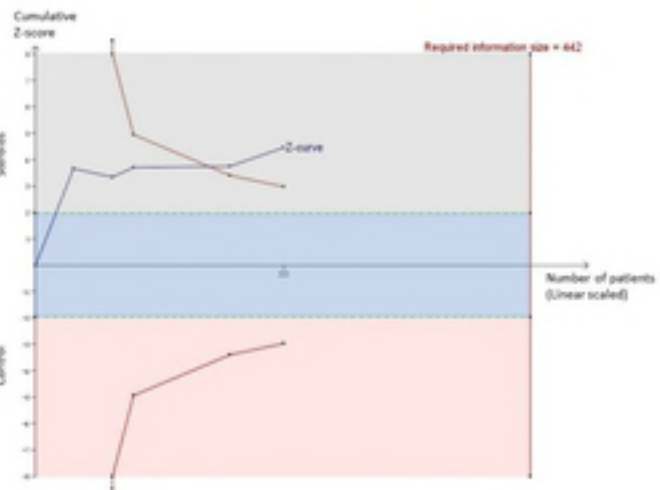**b**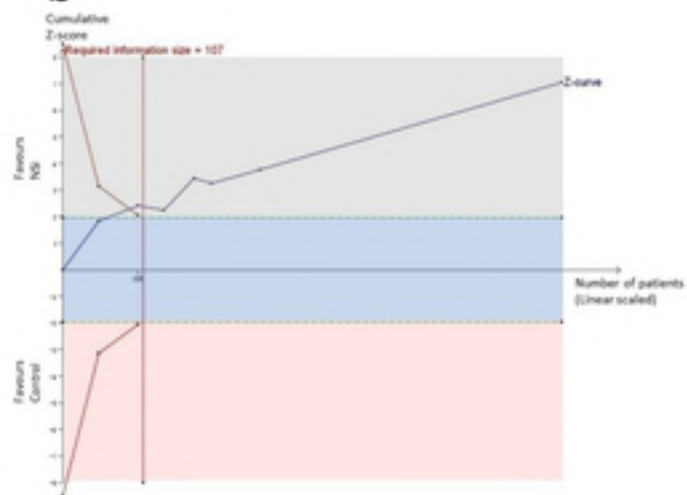**c**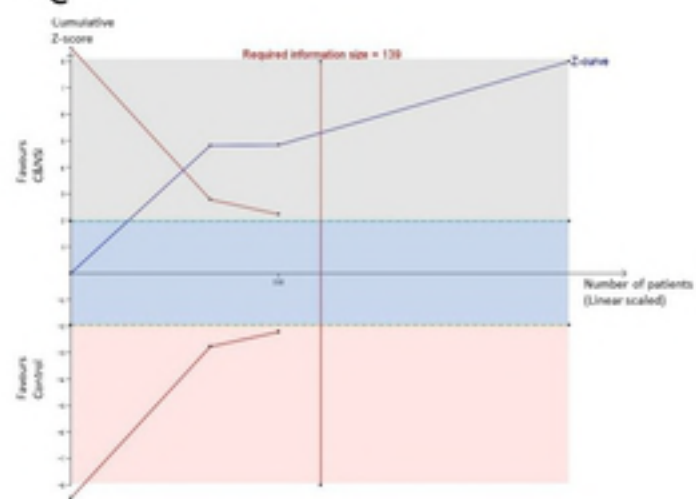**Fig.4**

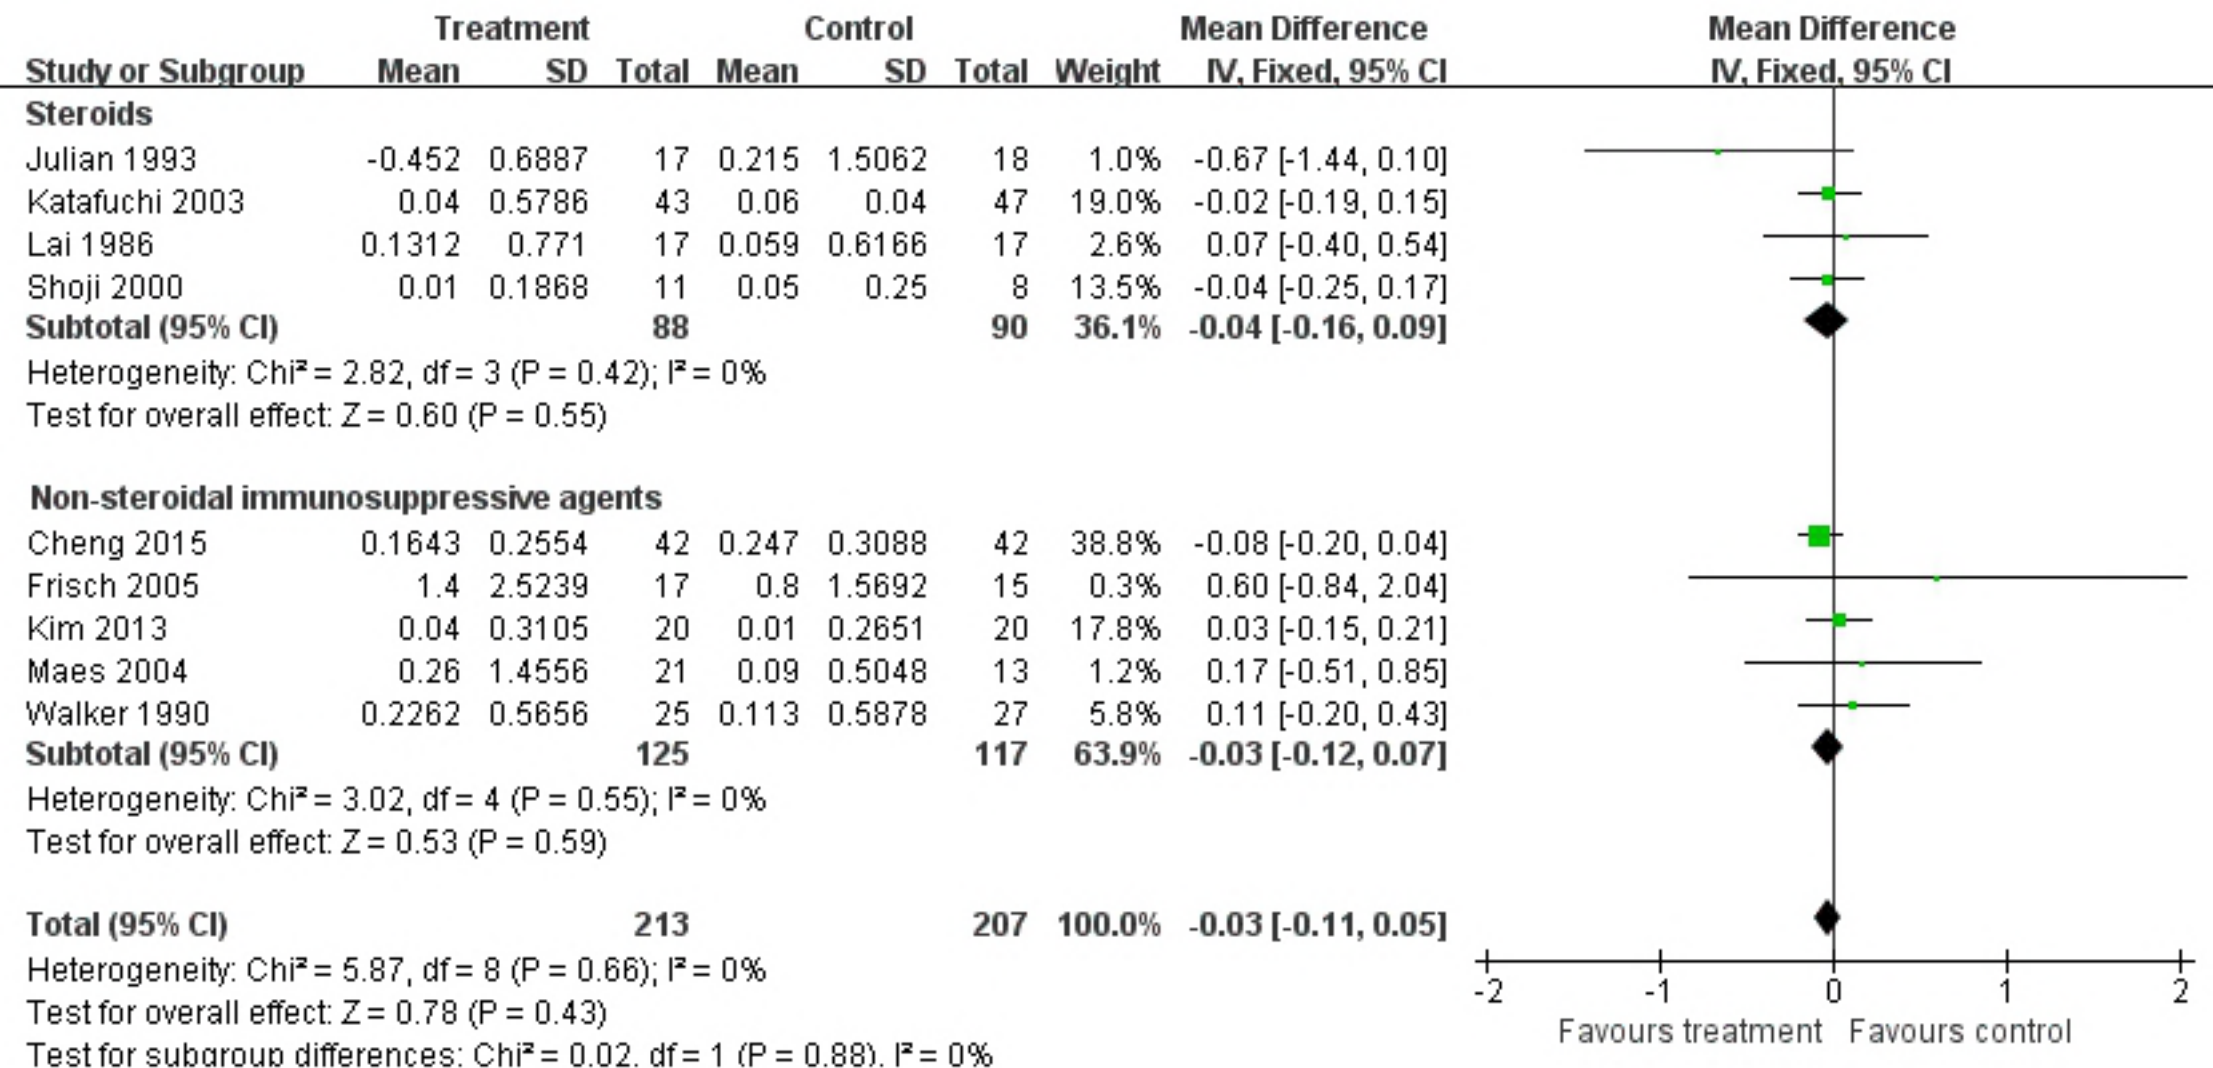

Fig.5



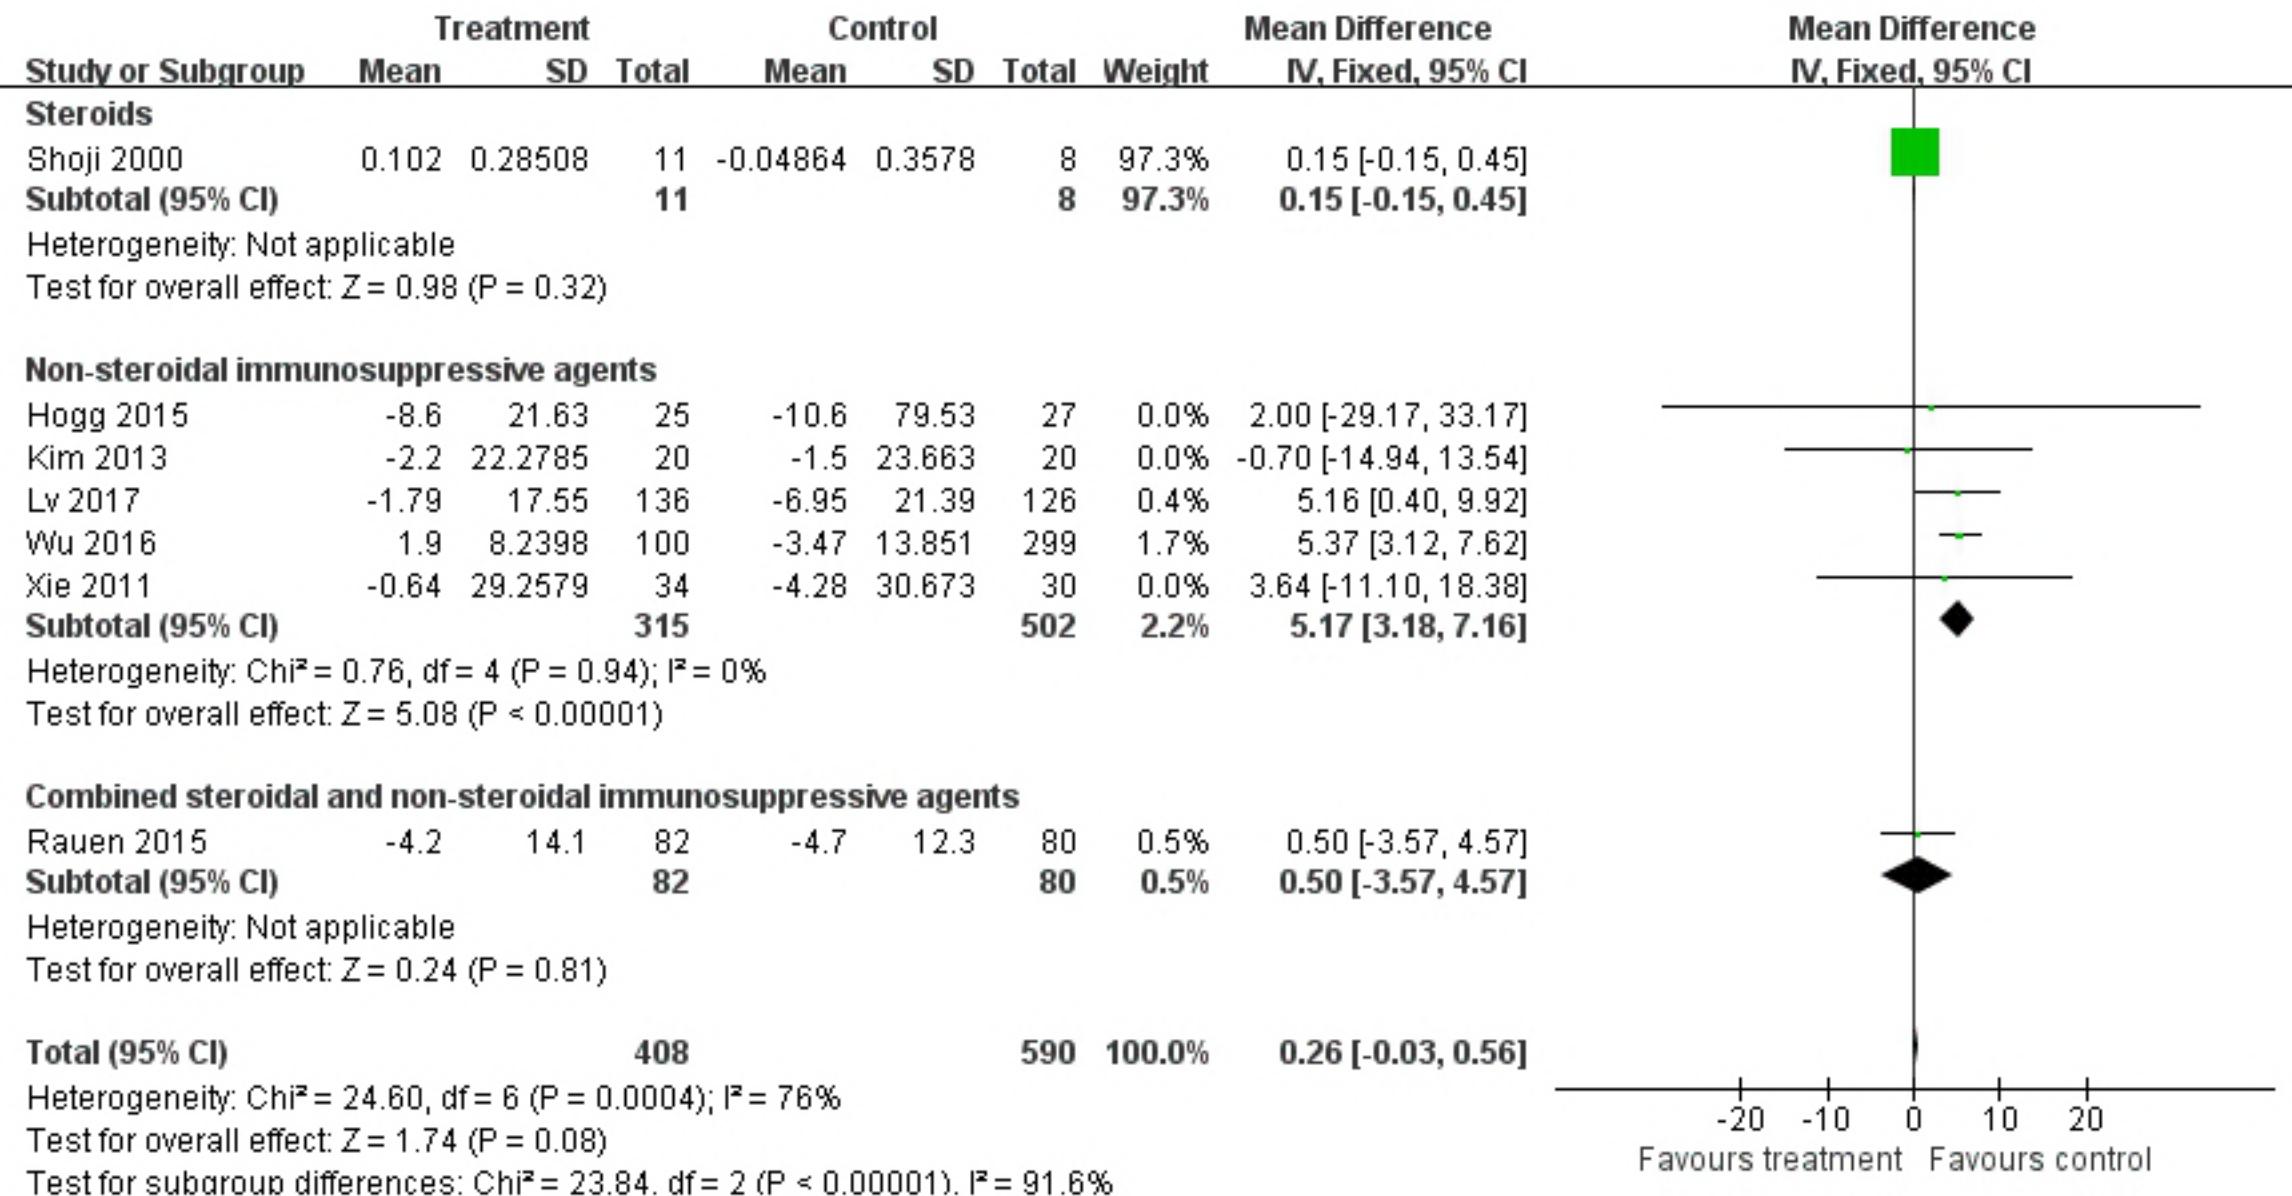

Fig.6

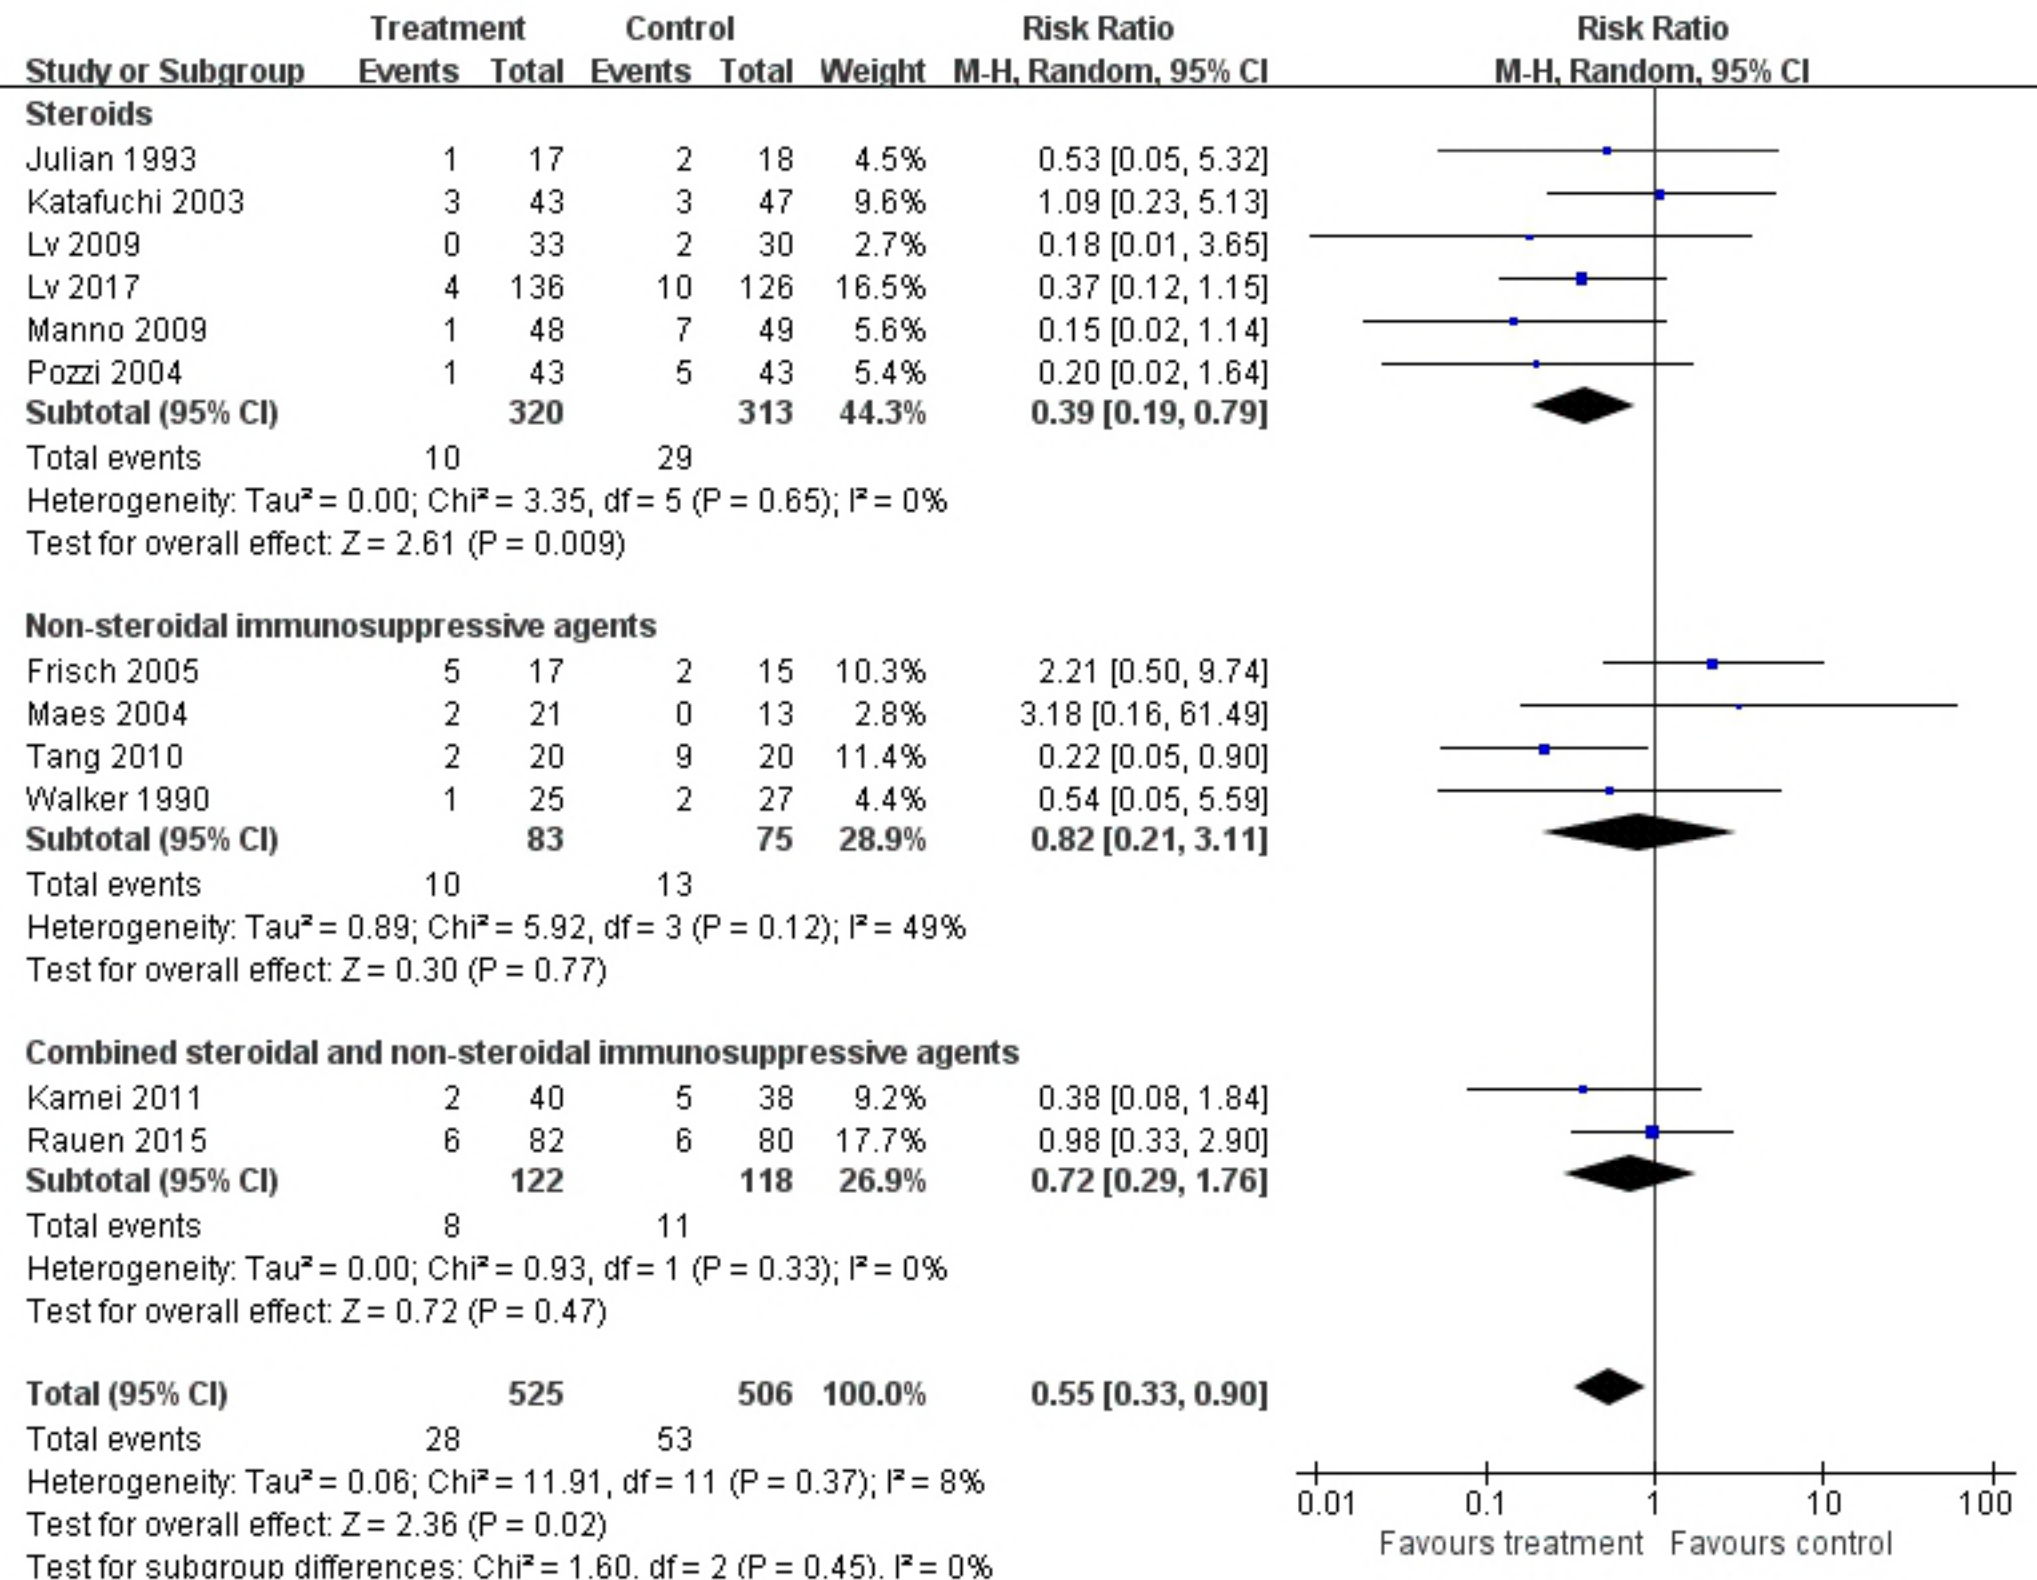

Fig.7
